# Supplementary material for: Transmission of SARS-CoV-2 Associated with Cruise Ship Travel: A Systematic Review
Source: MDPI journal article supplement (doi:10.3390/tropicalmed7100290), 2022-10-09
Supplement: s1 [file s1]

## Supplementary Material S7

### Timeline of events on Diamond Princess cruise ship

| Date                 | Event                                                                                                                                                                                                                                                                                                                                                                                                                              | Notes                                                                         |
|----------------------|------------------------------------------------------------------------------------------------------------------------------------------------------------------------------------------------------------------------------------------------------------------------------------------------------------------------------------------------------------------------------------------------------------------------------------|-------------------------------------------------------------------------------|
| 17 January 2020      | <ul style="list-style-type: none"> <li>Hong-Kong case arrives to Japan</li> </ul>                                                                                                                                                                                                                                                                                                                                                  | Yamagishi 2020                                                                |
| 19 January 2020      | <ul style="list-style-type: none"> <li>Index case developed symptoms; he disembarked on D5, and tested RT-PCR positive on 1 Feb 2020 (13 days later)</li> <li>Index case (Hong Kong case) – onset of cough</li> </ul>                                                                                                                                                                                                              | NIID 2020<br>Yamagishi 2020                                                   |
| 20 January 2020 – D0 | <ul style="list-style-type: none"> <li>The ship left Yokohama Port</li> <li>The 80-year-old Chinese gentleman, a resident of Hong Kong, China, visited Shenzhen in China's Guangdong Province for a few hours on January 10 (Nakazawa 2020). He took a flight from Hong Kong to Tokyo with his two daughters on 17 January 2020 and they embarked on the cruise ship in Yokohama, Tokyo on 20 January 2020 (Leung 2020)</li> </ul> | <a href="https://wars.vote4.hk/en/cases/">https://wars.vote4.hk/en/cases/</a> |
| 21 January – D1      | <ul style="list-style-type: none"> <li>N/R</li> </ul>                                                                                                                                                                                                                                                                                                                                                                              |                                                                               |
| 22 January – D2      | <ul style="list-style-type: none"> <li>Passenger developed symptoms</li> <li>Kagoshima tour + bus</li> <li>The index case participated in a tour of Kagoshima, Japan during a shore-based stop (Yamagishi 2020)</li> <li>Other than the Hong Kong-related index case, symptom onset for the earliest confirmed case was 22 January</li> </ul>                                                                                      | Kakimoto 2020<br>Plucinski 2020<br>Yamagishi 2020<br><br>Yamagishi 2020       |
| 23 January – D3      | <ul style="list-style-type: none"> <li>Index case developed fever?</li> <li>Index case developed cough?</li> </ul>                                                                                                                                                                                                                                                                                                                 | Kakimoto 2020<br>Sekizuka 2020                                                |
| 24 January – D4      | <ul style="list-style-type: none"> <li>N/R</li> </ul>                                                                                                                                                                                                                                                                                                                                                                              |                                                                               |
| 25 January – D5      | <ul style="list-style-type: none"> <li>Hong Kong tour + bus</li> <li>Index case disembarked in Hong Kong</li> <li>The ship visited Hong Kong</li> </ul>                                                                                                                                                                                                                                                                            | Plucinski 2020<br>NIIDS 2020<br>Yamagishi 2020                                |
| 26 January – D6      | <ul style="list-style-type: none"> <li>N/R</li> </ul>                                                                                                                                                                                                                                                                                                                                                                              |                                                                               |
| 27 January – D7      | <ul style="list-style-type: none"> <li>Chan May Port, Vietnam tour + bus</li> </ul>                                                                                                                                                                                                                                                                                                                                                | Nakazawa 2020, Yamagishi 2020; Plucinski 2020                                 |
| 28 January – D8      | <ul style="list-style-type: none"> <li>Cai Lan, Vietnam</li> </ul>                                                                                                                                                                                                                                                                                                                                                                 | Nakazawa 2020                                                                 |
| 29 January – D9      | <ul style="list-style-type: none"> <li>1 patient with symptoms</li> </ul>                                                                                                                                                                                                                                                                                                                                                          | Kato 2020                                                                     |

|                  |                                                                                                                                                                                                                                                                                                                                                                                                                                                                                                                                                                                                                                                                                                                                |                                                                                                                                                               |
|------------------|--------------------------------------------------------------------------------------------------------------------------------------------------------------------------------------------------------------------------------------------------------------------------------------------------------------------------------------------------------------------------------------------------------------------------------------------------------------------------------------------------------------------------------------------------------------------------------------------------------------------------------------------------------------------------------------------------------------------------------|---------------------------------------------------------------------------------------------------------------------------------------------------------------|
|                  | <ul style="list-style-type: none"> <li>• Index case – fever</li> </ul>                                                                                                                                                                                                                                                                                                                                                                                                                                                                                                                                                                                                                                                         | Hoshino 2020                                                                                                                                                  |
| 30 January – D10 | <ul style="list-style-type: none"> <li>• Index case – developed fever</li> <li>• Index case - attended a local hospital in Hong Kong</li> </ul>                                                                                                                                                                                                                                                                                                                                                                                                                                                                                                                                                                                | Yamahata 2020                                                                                                                                                 |
| 31 January – D11 | <ul style="list-style-type: none"> <li>• Keelung, Taiwan</li> </ul>                                                                                                                                                                                                                                                                                                                                                                                                                                                                                                                                                                                                                                                            | Yamagishi 2020                                                                                                                                                |
| 1 February – D12 | <ul style="list-style-type: none"> <li>• Naha, Japan; Okinawa port</li> <li>• The Diamond Princess stops at Okinawa. A quarantine of the Diamond Princess (based on Quarantine Law) was ordered at Okinawa Port</li> <li>• Index case – RT-PCR positive for SARS-COV-2</li> <li>• Symptom onset date of the first crew member case was 1 February</li> </ul>                                                                                                                                                                                                                                                                                                                                                                   | <p>Nakazawa 2020; Yamagishi 2020</p> <p>NIID 2020; Sekizuka 2020<br/>Yamagishi 2020</p>                                                                       |
| 2 Feb – D13      | <ul style="list-style-type: none"> <li>• First crew member with symptoms (food service worker (Kakimoto 2020)</li> <li>• 2 patients developed symptoms</li> </ul>                                                                                                                                                                                                                                                                                                                                                                                                                                                                                                                                                              | <p>Kakimoto 2020</p> <p>Kato 2020</p>                                                                                                                         |
| 3 Feb – D14      | <ul style="list-style-type: none"> <li>• The ship arrived at Yokohama</li> <li>• On board: 2666 passengers, 1045 crew</li> <li>• Quarantine of the ship</li> <li>• Health authorities in Japan reviewed logs at the onboard clinic for symptomatic (febrile or respiratory) patients and obtained respiratory specimens from them</li> <li>• Starting on 3 Feb, quarantine officers took oropharyngeal samples from suspected cases and close contacts</li> <li>• All symptomatic passengers were tested upon arrival in Yokohama (10 passengers), and those with positive results were disembarked February 4 and 5</li> <li>• 3 crew members reported fever</li> <li>• Group activities – music show, other shows</li> </ul> | <p>NIID 2020</p> <p>NIID 2020</p> <p>Nakazawa 2020</p> <p>NIID 2020</p> <p>Yamagishi 2020</p> <p>Kakimoto 2020</p> <p>Kakimoto 2020</p> <p>Plucinski 2020</p> |
| 4 Feb – D15      | <ul style="list-style-type: none"> <li>• First crew member with positive RT-PCR</li> <li>• Group activities – music show, other shows</li> </ul>                                                                                                                                                                                                                                                                                                                                                                                                                                                                                                                                                                               | <p>Kakimoto 2020</p> <p>Plucinski 2020</p>                                                                                                                    |
| 5 Feb – D16      | <ul style="list-style-type: none"> <li>• 35/127 passengers with known onset, developed symptoms before D16</li> <li>• First 10/31 RT-PCR positive</li> <li>• Passengers quarantined in their cabins for 14 days; the crew continued to maintain ship functions and support passengers for their food, clothing, and shelter-related needs</li> <li>• Screening for the virus is implemented in the aged or people with chronic disease, even if asymptomatic</li> </ul>                                                                                                                                                                                                                                                        | <p>NIID 2020</p> <p>Plucinski 2020, Yamahata 2020</p> <p>NIID 2020</p> <p>Nakazawa 2020</p>                                                                   |



|              |                                                                                                                                                                                                                                                                                                                                                                                                                                                                                                                                                                        |                                                                       |
|--------------|------------------------------------------------------------------------------------------------------------------------------------------------------------------------------------------------------------------------------------------------------------------------------------------------------------------------------------------------------------------------------------------------------------------------------------------------------------------------------------------------------------------------------------------------------------------------|-----------------------------------------------------------------------|
|              | <ul style="list-style-type: none"> <li>First peak of symptomatic cases among crew peaked (for cases with an available onset date, in 127 passengers and 51 crew</li> </ul>                                                                                                                                                                                                                                                                                                                                                                                             | NIID 2020                                                             |
| 12 Feb – D23 | <ul style="list-style-type: none"> <li>39/53 RT-PCR positive</li> <li>Total number of positive tests: 174/492</li> </ul>                                                                                                                                                                                                                                                                                                                                                                                                                                               | Yamahata 2020<br>Yamahata 2020                                        |
| 13 Feb – D24 | <ul style="list-style-type: none"> <li>A policy allows the aged to disembark, specifically, older people over the age of 80 years who are in cabins without windows and suffer from chronic illness</li> <li>Total number of positive tests: 218/713</li> <li>44/221 RT-PCR positive</li> <li>Second peak of symptomatic cases among crew (for cases with an available onset date, in 127 passengers and 51 crew</li> </ul>                                                                                                                                            | Nakazawa 2020<br><br>Yamahata 2020<br>Yamahata 2020<br>NIID 2020      |
| 14 Feb – D25 | <ul style="list-style-type: none"> <li>67/217 RT-PCR positive</li> <li>Total number of positive tests: 285/930</li> </ul>                                                                                                                                                                                                                                                                                                                                                                                                                                              | Yamahata 2020<br>Yamahata 2020                                        |
| 15 Feb – D26 | <ul style="list-style-type: none"> <li>Total number of positive tests: 285/930</li> <li>15-17 Feb 2020 – 169/793 RT-PCR positive tests</li> <li>15-17 Feb 2020 - pharyngeal specimens of 896 persons (880 passengers, 15 crew members, and 1 quarantine officer). PCR (RT-qPCR) test was positive for 148 individuals (138 passengers, 9 crew members, and 1 quarantine officer), indicating that the positivity rate was 16.4% (147 positive individuals [excluding the officer] of 895 subjects).</li> </ul>                                                         | Yamahata 2020<br>Yamahata 2020<br>Sekizuka 2020                       |
| 16 Feb – D27 | <ul style="list-style-type: none"> <li>70/289 RT-PCR positive</li> <li>Total number of positive tests: 335/1219</li> <li>16 -23 February – 329 persons were repatriated by air to their home country (USA); they entered quarantine or isolation. Quarantine was used for persons who were exposed; isolation was used for persons who had positive test results for SARS-CoV-2</li> <li>16–17 February, most Americans were repatriated voluntarily to the United States on chartered flights and quarantined under federal authority on US military bases</li> </ul> | Yamahata 2020<br>Yamahata 2020<br>Moriarty 2020<br><br>Plucinski 2020 |
| 17 Feb – D28 | <ul style="list-style-type: none"> <li>99/504 RT-PCR positive</li> <li>Total number of positive tests: 454/1723</li> <li>Evacuation of Australian passengers</li> </ul>                                                                                                                                                                                                                                                                                                                                                                                                | Yamahata 2020<br>Yamahata 2020<br>Quigley 2020                        |
| 18 Feb – D29 | <ul style="list-style-type: none"> <li>88/681 RT-PCR positive</li> </ul>                                                                                                                                                                                                                                                                                                                                                                                                                                                                                               | Yamahata 2020                                                         |

|              |                                                                                                                                                                                                                                                                                                                                                                                                                                                                                                                                                                                                                                               |                                                                                            |
|--------------|-----------------------------------------------------------------------------------------------------------------------------------------------------------------------------------------------------------------------------------------------------------------------------------------------------------------------------------------------------------------------------------------------------------------------------------------------------------------------------------------------------------------------------------------------------------------------------------------------------------------------------------------------|--------------------------------------------------------------------------------------------|
|              | <ul style="list-style-type: none"> <li>Total number of positive tests: 542/2404</li> </ul>                                                                                                                                                                                                                                                                                                                                                                                                                                                                                                                                                    | Yamahata 2020                                                                              |
| 19 Feb – D30 | <ul style="list-style-type: none"> <li>End of quarantine period</li> <li>Disembarkation begins of passengers confirmed as not being infected</li> <li>Criteria for disembarkation of non-cases included 1) completion of a 14-day period without sharing a cabin with a confirmed case; 2) a negative result for a SARS-CoV-2 by PCR in the final days of the period; and 3) no relevant symptoms identified during a medical screening in the final day of the period.</li> <li>79 RT-PCR positive</li> <li>79/617 RT-PCR positive</li> <li>Total number of positive tests: 621/3011</li> <li>Repatriation of Australian citizens</li> </ul> | NIID 2020<br>Nakazawa 2020<br>NIID 2020<br><br>NIID 2020<br>Yamahata 2020<br>Yamahata 2020 |
| 20 Feb – D31 | <ul style="list-style-type: none"> <li>13/52 RT-PCR positive</li> <li>Total number of positive tests: 634/3063</li> <li>Hong Kong citizens were air-evacuated from the Diamond Princess cruise ship on February 20 and February 21, 2020</li> </ul>                                                                                                                                                                                                                                                                                                                                                                                           | Yamahata 2020<br>Yamahata 2002<br>Hung 2020                                                |
| 21 Feb – D32 | <ul style="list-style-type: none"> <li>Total no of positive tests: 634/3063</li> <li>Infection had also been confirmed in 5 quarantined officers and health care workers</li> <li>Disembarkation of 970 asymptomatic passengers with negative test results is completed</li> </ul>                                                                                                                                                                                                                                                                                                                                                            | Yamahata 2020<br>Nakazawa 2020<br><br>Nakazawa 2020                                        |
| 22 Feb – D33 | <ul style="list-style-type: none"> <li>Approximately 1300 people, including crew members, foreigners waiting for charter aircraft, and passengers who were in close contact with or in the same room as a person who tested positive, are aboard</li> <li>Total number of positive tests: 634/3063</li> </ul>                                                                                                                                                                                                                                                                                                                                 | Nakazawa 2020<br><br>Yamahata 2020                                                         |
| 23 Feb – D34 | <ul style="list-style-type: none"> <li>57/831 RT-PCR positive (Yamahata 2020)</li> <li>Total no of positive tests: 691/3894 (Yamahata 2020)</li> </ul>                                                                                                                                                                                                                                                                                                                                                                                                                                                                                        | Yamahata 2020<br>Yamahata 2020                                                             |
| 24 Feb – D35 | <ul style="list-style-type: none"> <li>The remaining passengers disembark.</li> </ul>                                                                                                                                                                                                                                                                                                                                                                                                                                                                                                                                                         |                                                                                            |
| 25 Feb – D36 | <ul style="list-style-type: none"> <li>N/R</li> </ul>                                                                                                                                                                                                                                                                                                                                                                                                                                                                                                                                                                                         |                                                                                            |
| 26 Feb – D37 | <ul style="list-style-type: none"> <li>N/R</li> </ul>                                                                                                                                                                                                                                                                                                                                                                                                                                                                                                                                                                                         |                                                                                            |
| 27 Feb – D38 | <ul style="list-style-type: none"> <li>N/R</li> </ul>                                                                                                                                                                                                                                                                                                                                                                                                                                                                                                                                                                                         |                                                                                            |
| 28 Feb - D39 | <ul style="list-style-type: none"> <li>N/R</li> </ul>                                                                                                                                                                                                                                                                                                                                                                                                                                                                                                                                                                                         |                                                                                            |
| 29 Feb – D40 | <ul style="list-style-type: none"> <li>N/R</li> </ul>                                                                                                                                                                                                                                                                                                                                                                                                                                                                                                                                                                                         |                                                                                            |

|               |                                                                                                                                       |                            |
|---------------|---------------------------------------------------------------------------------------------------------------------------------------|----------------------------|
| 1 March – D41 | <ul style="list-style-type: none"> <li>Disembarkation of 3711 individuals completed. The remaining crew members disembark.</li> </ul> | Moriarty 2020              |
| 8 March       | <ul style="list-style-type: none"> <li>Total number of cases: 697</li> <li>Total number of cases: 696</li> </ul>                      | Sekizuka 2020<br>NIID 2020 |

## References:

Hung IF, Cheng VC, Li X, Tam AR, Hung DL, Chiu KH, Yip CC, Cai JP, Ho DT, Wong SC, Leung SS, Chu MY, Tang MO, Chen JH, Poon RW, Fung AY, Zhang RR, Yan EY, Chen LL, Choi CY, Leung KH, Chung TW, Lam SH, Lam TP, Chan JF, Chan KH, Wu TC, Ho PL, Chan JW, Lau CS, To KK, Yuen KY. SARS-CoV-2 shedding and seroconversion among passengers quarantined after disembarking a cruise ship: a case series. *Lancet Infect Dis.* 2020; 20(9):1051-1060. doi: 10.1016/S1473-3099(20)30364-9.

Kakimoto K, Kamiya H, Yamagishi T, Matsui T, Suzuki M, Wakita T. Initial investigation of transmission of COVID-19 among crew members during quarantine of a cruise ship - Yokohama, Japan, February 2020. *MMWR Morb Mortal Wkly Rep.* 2020 Mar 20;69(11):312-313. doi: 10.15585/mmwr.mm6911e2. Erratum in: *MMWR Morb Mortal Wkly Rep.* 2020; 69(13):389.

Kato H, Shimizu H, Shibue Y, Hosoda T, Iwabuchi K, Nagamine K, Saito H, Sawada R, Oishi T, Tsukiji J, Fujita H, Furuya R, Masuda M, Akasaka O, Ikeda Y, Sakamoto M, Sakai K, Uchiyama M, Watanabe H, Yamaguchi N, Higa R, Sasaki A, Tanaka K, Toyoda Y, Hamanaka S, Miyazawa N, Shimizu A, Fukase F, Iwai S, Komase Y, Kawasaki T, Nagata I, Nakayama Y, Takei T, Kimura K, Kunisaki R, Kudo M, Takeuchi I, Nakajima H. Clinical course of 2019 novel coronavirus disease (COVID-19) in individuals present during the outbreak on the Diamond Princess cruise ship. *J Infect Chemother.* 2020;26(8):865-869. doi: 10.1016/j.jiac.2020.05.005

Moriarty LF, Plucinski MM, Marston BJ, Kurbatova EV, Knust B, Murray EL, Pesik N, Rose D, Fitter D, Kobayashi M, Toda M, Cantey PT, Scheuer T, Halsey ES, Cohen NJ, Stockman L, Wadford DA, Medley AM, Green G, Regan JJ, Tardivel K, White S, Brown C, Morales C, Yen C, Wittry B, Freeland A, Naramore S, Novak RT, Daigle D, Weinberg M, Acosta A, Herzig C, Kapella BK, Jacobson KR, Lamba K, Ishizumi A, Sarisky J, Svendsen E, Blocher T, Wu C, Charles J, Wagner R, Stewart A, Mead PS, Kurylo E, Campbell S, Murray R, Weidle P, Cetron M, Friedman CR; CDC Cruise Ship Response Team; California Department of Public Health COVID-19 Team; Solano County COVID-19 Team. Public Health Responses to COVID-19 Outbreaks on Cruise Ships - Worldwide, February-March 2020. *MMWR Morb Mortal Wkly Rep.* 2020; 69(12):347-352. doi: 10.15585/mmwr.mm6912e3.

NIID - Expert Taskforce for the COVID-19 Cruise Ship Outbreak. Epidemiology of COVID-19 outbreak on cruise ship quarantined at Yokohama, Japan, February 2020. *Emerg Infect Dis.* 2020; 26(11):2591-2597. doi: 10.3201/eid2611.201165.

Nakazawa E, Ino H, Akabayashi A. Chronology of COVID-19 cases on the Diamond Princess cruise ship and ethical considerations: a report from Japan. *Disaster Med Public Health Prep.* 2020;14(4):506-513. doi:10.1017/dmp.2020.50

Plucinski MM, Wallace M, Uehara A, Kurbatova EV, Tobolowsky FA, Schneider ZD, Ishizumi A, Bozio CH, Kobayashi M, Toda M, Stewart A, Wagner RL, Moriarty LF, Murray R, Queen K, Tao Y, Paden C, Mauldin MR, Zhang J, Li Y, Elkins CA, Lu X, Herzig CTA, Novak R, Bower W, Medley AM, Acosta AM, Knust B, Cantey PT, Pesik NT, Halsey ES, Cetron MS, Tong S, Marston BJ, Friedman CR. Coronavirus Disease 2019 (COVID-19) in Americans aboard the Diamond Princess cruise ship. *Clin Infect Dis*. 2021; 72(10):e448-e457. doi: 10.1093/cid/ciaa1180.

Quigley, A., Nguyen, P., Stone, H., Lim, S., MacIntyre, C. Cruise ship travel and the spread of COVID-19 – Australia as a case study. *International Journal of Travel Medicine and Global Health*, 2020; 9(1): 10-18. doi: 10.34172/ijtmgh.2021.03

Sekizuka T, Itokawa K, Kageyama T, Saito S, Takayama I, Asanuma H, Nao N, Tanaka R, Hashino M, Takahashi T, Kamiya H, Yamagishi T, Kakimoto K, Suzuki M, Hasegawa H, Wakita T, Kuroda M. Haplotype networks of SARS-CoV-2 infections in the Diamond Princess cruise ship outbreak. *Proc Natl Acad Sci U S A*. 2020; 117(33):20198-20201. doi: 10.1073/pnas.2006824117.

Yamagishi T, Kamiya H, Kakimoto K, Suzuki M, Wakita T. Descriptive study of COVID-19 outbreak among passengers and crew on Diamond Princess cruise ship, Yokohama Port, Japan, 20 January to 9 February 2020. *Euro Surveill*. 2020; 25(23):2000272. doi: 10.2807/1560-7917.ES.2020.25.23.2000272. Erratum in: *Euro Surveill*. 2020 Jun;25(24): PMID: 32553062; PMCID: PMC7403638.

Yamahata Y, Shibata A. Preparation for quarantine on the cruise ship Diamond Princess in Japan due to COVID-19. *JMIR Public Health Surveill*. 2020; 6(2):e18821. doi: 10.2196/18821.
