# Supplementary material for: Transmission of SARS-CoV-2 Associated with Cruise Ship Travel: A Systematic Review
Source: Trop Med Infect Dis. 2022 Oct 9;7(10):290. doi: 10.3390/tropicalmed7100290 (PMC9610645; doi:10.3390/tropicalmed7100290)
Supplement: Supplementary file 1 [file tropicalmed-07-00290-s001.zip]

Archive with 11 entries (11 files):
- PRISMA_2020_checklist.pdf
- S1. Updated Generic Protocol.pdf
- S10. Viral cultures.pdf
- S2. Search strategy. Cruise ships.pdf
- S3. Flow chart showing the process for inclusion of studies investigating cruise ships transmission.pptx
- S4. List of excluded studies - cruise ships.pdf
- S5. List of included studies - cruise ships.pdf
- S6. USA citizens.pdf
- S7. Timeline DP.pdf
- S8. Characteristics of included studies. .xlsx
- S9. Genomic sequencing.pdf
