# Supplementary material for: Transmission of SARS-CoV-2 Associated with Cruise Ship Travel: A Systematic Review
Source: Trop Med Infect Dis. 2022 Oct 9;7(10):290. doi: 10.3390/tropicalmed7100290 (PMC9610645; doi:10.3390/tropicalmed7100290)
Supplement: Supplementary file 1 [file tropicalmed-07-00290-s001.zip › S8. Characteristics of included studies. .xlsx]

## Sheet: Sheet1
Study	Cruise: Origin and destination	Technical specifications	Ventilation system	Duration	Stops	Total no of px and crew	No of px and crew with COVID-19	Infected individuals clinical status	Infected individuals RT-PCR	First SARS-COV-2 infection - symptoms	First SARS-COV-2 infection - RT-PCR	Index case definition	Index case number	Index case RT-PCR, Ct	Index case age	Index case gender	Index case country of residence	Index case location	Index case symptoms during cruise	Index case - mask	Contact definition	Contact - RT-PCR, Ct	Genetic sequencing	Tracing strategy	Methods used to identify contacts	Methods used for contacting contacts	Number of identified contacts	Number of successfully traced contacts	Number of secondary cases	Age of secondary case	Gender of secondary case	Symptoms of secondary cases	RT-PCR - secondary cases	Spatial distribution in relation to closest index case	Secondary cases - masks	Immunological status of secondary cases (including vaccination)	Exposure of secondary cases (before, during, and after the cruise)	Intervention	Notes	Funding
Abe 2022	Docked, in repair	Costa Atlantica cruise ship, which had been in repair in Nagasaki, Japan, since January 2020 to April 2020	N/R	January - April 2020	N/A	632 crew	148 crew	35.6% asymptomatic	The cut-off values were set at a Ct value of 40.	First case - fever on 22 March 2020 (boarded on 18 March 2020)	RT-PCR positive, with Ct<40	N/R	1 crew	RT-PCR positive, with Ct<40	N/R	N/R	N/R	Belonged to the entertainment group	Fever (>37.1*C)	N/R	N/R	RT-PCR positive, with Ct<40	All positive samples that showed high viral titers (Ct<30 by RT-qPCR) were subjected to whole-genome sequencing, and 94 complete genome sequences were obtained for the CA cluster. Comparison with other settings: CA - 94 samples, 1175 mutations (number/strain 12.5), 755 amino acid substitutions (number/strain 8.03). DP - 71 samples, 149 mutations (number/strain 2.1), 110 amino acid substitutions (…	All crew members were tested by RT-LAMP between 20-25 April 2020. The results of the COVID-19-positive samples, were confirmed by RT-qPCR.	All crew on the ship.	N/A	All crew	All crew.	147 crew	N/R	N/R	N/R	RT-PCR positive, with Ct<40	Index case - entertainment group	N/R	N/R	N/R	N/R	CA strains formed one large cluster without any other reference strains, indicating that CA strains originated from one ancestral strain introduced on the cruise ship and circulated in a highly isolated environment. However, the number of mutations in the DP cluster was remarkably lower than that in the CA cluster, indicating environmental differences between the two cruise ships. The SARS-CoV-2 …	Science and Technology Research Partnership for Sustainable Development (SATREPS), Japan International Cooperation Agency (JICA) and Japan Agency for Medical Research and Development (AMED) (grant number JP21jm0110013), and a Grant-in-Aid for Scientific Research (KAKENHI) from the Japan Society for the Promotion of Science (JSPS) (grant number JP19K24679).
Álvarez-León 2022	5 European flag ships; 80 itineraries between different Canary Islands	Cruise 1 - 1,447 cabins, 11 decks with cabins. Capacity - 2900 px , 1100 staff. Cruise 2 - 1,447 cabins, 11 decks with cabins. Capacity - 2900 px, 1100 staff. Cruise 3 - 521 cabins 7 px decks. Capacity - 500 px, 370 staff. Cruise 4 - 1096 cabins, 14 px decks. Capacity - 2700 px, 620 staff. Cruise 5 - 1643 cabins, 9 decks with cabins. Capacity - 3300 px 950 staff	N/R	November 2020 - May 2021; routes lasting 7 or 14days	N/R	103,500 px, 3228 crew	19 px, 1 crew (Cruise 1 - 16px, 1 crew. Cruise 2 - 3px)	Except for 2 px who developed symptoms during the trip, the rest of the cases were asymptomatic at diagnostic and were detected during routine screening prior to disembarkation, or during close contact screening once a case was diagnosed.	One negative PCR 72 h before boarding or one negative antigen test on same boarding day for px, and both negative test for crew. Diagnostic test - unclear; periodic antigen test screening on board - some companies made it weekly for crew, and on third and fourth day of trip for px); some cruise ships screened on the third day after embarkation, while others screened every fifth or 15th day; pre-d…	Unclear. At least 6 of the COVID-19 cases embarked during the incubation period although they had negative test prior to embarkation.	Unclear	N/R	Unclear: at least 6 px	Unclear	N/R	N/R	Germany	5 px were infected sharing a cabin with an undetected index case. 4 px were infected due to close relation with an undetected index case. 2 px were infected in an on-board restaurant (sharing a table or in a nearby seat close to an undetected case). 2 px were infected sharing an open bar for smokers. The only infected staff was the cabin cleaner of an undetected case.	Unclear.	The use of a mask (for px and crew) was required indoors,in those spaces of shared use (onboard and excursions), except when eating, drinking or during the stay in the cabins.	Close contacts a person who has been in the same place as a COVID-19 case at <2m for >15 min during a 24 h period even if it is not consecutive, within a period of time ranging from 2 days before to 10 days after the onset of symptoms or diagnosis if asymptomatic)	Unclear	N/A	On-board medical service performed epidemiological study and identification of close contacts. Cases and close contacts were disembarked and transferred to the medical service on land or to the accommodation facilities. The external prearranged medical service monitored the islation of cases.	On-board medical service performed epidemiological study and identification of close contacts. The pre-disembarkation screening was one of the main ways to detect COVID-19 cases onboard,as the majority of cases were asymptomatic.	Suspected cases and close contacts were tested on board and, if necessary, confirmed on land. Cases and close contacts were disembarked and transferred to the medical service on land or to the accommodation facilities.The external prearranged medical service monitored the isolation of the cases (until 3 days after the resolution of fever and symptoms with a minimum period of 10 days from the onse…	A total of 20 cases (19 px and one crew member) and 96 close contacts (68 px from among 63709 px and 28 crew members out of 1420 were identified during the 7 months of navigation.	68/63709 px, 28/1420 crew	Minimum 13 px, 1 crew	Unclear	Unclear	Unclear	Unclear	5 px were infected sharing a cabin with an undetected case. 4 px were infected due to close relation with an undetected case. 2 px were infected in an on-board restaurant (sharing a table or in a nearby seat close to an undetected case). 2 px were infected sharing an open bar for smokers.The only infected staff was the cabin cleaner of an undetected case.	The use of a mask (for px and crew) was required indoors,in those spaces of shared use (onboard and excursions), except when eating, drinking or during the stay in the cabins.	None of the cases was vaccinated. Information about demography or vaccination status of the rest of the px and the crew was not available to the authors, except that all px came from and returned to a European country (mainlyGermany), and that there was no age restriction.	Before the cruise - unknown. During cruise: Cruise 1: case 1-3 shared a cabin; Cases 4-6 sat at nearby tables at the on-board interior restaurant and had also contact in an on-board open bar where smoking is permitted. Case 7 - close friend to case 6. Case 8-9 sat at nearby tables in a non-board semi-open buffet style restaurant. case 10 (crew) was cabin cleaner of case 9. Case 11-13 were close c…	COVID-19 prevention protocol. All cases and close contacts were disembarked and isolated or quarantined on land.	Secondary attack rate between the identified close contacts during quarantine was only 3%. 21% of confirmed cases were casual contacts of a case at on-board food and beverage venues. Information about demography or vaccination status of the rest of the px and the crew was not available. Except for 2 px who developed symptoms during the trip, the rest of the cases were asymptomatic at diagnostic a…	None.
Gravningen 2022	Two one-week voyages from Tromsřand around the Svalbard archipelago at 75 °north and back.	The ship had a total capacity of 528 px	N/R	Expedition 1: July 17-24, 2020. Expedition 2: July 24-31, 2020	N/R	Expedition 1: 210 px and 160 crew. Expedition 2: 181 px and 160 crew. Most crew members attended both expeditions.	28/391 px (AR=7.2%, Expedition 1: 1.4%; Expedition 2: 13.8%); 42/167 crew (AR=25.2%)	Symptoms were assessed in 114 crew members. 34/37 symptomatic; 3/37 asymptomatic.	Participants’ confirmed PCR-positive tests (n=114 crew) had mean a Ct value of 24.9 (range 15.4-36.8).	Reported dates for symptom onset for crew members ranged from July 6 to August 11, and for px, from July 26 to August 8.	A nonparticipant crew member reported symptom onset on July 6, 2020. Among the 114 participants - symptom's onsent - 20 July 2020	First symptomatic crew member - primary case	Expedition 1: 1 crew . Expedition 2: several symptomatic crew members were reported unable to work but were not tested nor isolated.	NOPS were analyzed with a rt-PCR test with primers and probe in the E-gene, which was considered positive when the Ct value was ≤37	N/R	N/R	Asian	N/R	Expedition 1: 1 crew symptomatic 11 days before the cruise). Expedition 2:	Unclear	A case was defined as a participant attending Expedition 2 with a SARS-CoV-2-positive PCR result.	RT-PCR positive, with Ct≤ 37	The network-analysis displayed four distinct clusters. The cluster 1 (n = 42) had an AR of 50%, of which 71% had catering occupations, all had the embarkation date July 6-8, 2020, most were Filipino (98%) and stayed in twin cabins (76%). Two clusters (Cluster 2, n = 31 and Cluster 3, n = 10) had an AR similar to that of the study population as a whole, and most participants were Filipino. Cluster…	All px and crew on both expeditions had a NP-OP swab taken, either in Tromsø or at their current location, which was tested by rt-PCR (D14-D20). All close contacts of cases on both expeditions were traced and tested. 71% of eligible crew members (114 of 160) agreed to participate to the study.	The NIPH received crew and px lists from the ship, including data on sex, age, country of origin, embarkation date, workplace, cabin number and type, symptom onset date, clinical symptoms, test date, and results that were included in the NIPH outbreak registry and used in the study.	Participants staying in hotels or the hospital were sampled on-site.	391 px; 167 crew	114 crew	Unclear. Expedition 1: 3px/210. Expedition 2: 25px/181	Unclear	Unclear	The first cases retrospectively reported symptom onset between D3-D5 (workers in catering occupations and mechanical operations). Nine days later, symptoms among administrative and passenger service staff were reported.	Participants’ confirmed PCR-positive tests had mean a Ct value of 24.9 (range 15.4-36.8).	The first cases retrospectively reporting symptom onset between D3-D5, worked in catering occupations and mechanical operations. Nine days later, symptoms among administrative and passenger service staffwere reported. No cases were identified among participants working on deck, with electricity and carpentry, or with medical and spa services. In multivariable analyses, being defined as a case was…	N/R	N/R	The ship had recently updated, but not fully implemented, outbreak prevention, control, and response plans. From July D-11 to D0, approximately 90 crew members, arrived in Norway, primarily from the Philippines. Before starting service, they had to provide COVID-19 certificates confirming negative results for tests taken 3-4 days before departure but were not tested in Norway before boarding the …	On D14, and during the following days, all px and crew on both expeditions had a nasopharynx-oropharynx swab taken, either in Tromsø or at their current location, which was tested by rt-PCR. All close contacts of cases on both expeditions were traced and tested. After July 31, 2020, crew member cases were isolated in single cabins or at the hospital, whereas those who tested neg- ative were quara…	All crew members who tested positive had attended both expeditions. The authors concluded that only one PCR-negative participant was seropositive for SARS-CoV-2, indicating a previous infection with COVID-19. The increasing number of cases from Expedition 1 to 2 shows that there was more extensive transmission on the second voyage with likely spill-over from crew to px. Given a typical incubation…	None.
Guagliardo 2020	89 voyages on 70 ships; 16 ships had recurrent outbreaks. Passenger data available for 57/89 voyages; crew data available for 52/89 voyages.	The report include the Diamond Princess, Grand Princess (Voyage B), and Greg Mortimer	N/R	19 January –16 April (2020). The median voyage duration was 7 days (range: 2–30 days)	The median number of ports of call was 5 (range: 2–14 ports).	145,460 px and 59,619 crew.	1669 (px and crew)	N/R	1669 RT-PCR positive; No data on Ct	N/R	N/R	N/R	N/R	N/R	N/R	N/R	N/R	N/R	N/R	N/R	N/R	N/R	N/R	Retrospective data; use of a database	CDC quarantine stations were notified of COVID-19 cases by cruise ship clinicians under CDC‟s regulatory authority or by local and state health departments. Data from these reports were entered into the Quarantine Activity Reporting System (QARS), a secure electronic database used by quarantine station staff. CDC also received line lists of COVID-19 cases from cruise lines.	N/A	N/R	N/R	N/R	N/R	N/R	N/R	RT-PCR positive, no data on Ct	N/R	N/R	N/R	N/R	Screening for COVID-19 symptoms; viral testing on two days and isolation of positive persons; reduction of passengers by 40%, crew by 20%, and port visits to one.	Authors included voyages that either fell under U.S. jurisdiction (docking in a U.S. port) or were carrying U.S. citizens during the period of interest. A confirmed ship or voyage had at least one individual that tested positive for SARS-CoV-2 (via RT-PCR) while on board or within 14 days of travel. A single confirmed case of COVID-19 occurring on a voyage was considered to be an “outbreak” of th…	Centers for Disease Control and Prevention
Goldenfeld 2020	N/R	Diamond Princess	N/R	N/R	N/R	N/R	Data on 6/15 repatriated Israeli px	3 asymptomatic; 3 pauci symptomatic	Case 1 - RT- PCR positive in Japan (D26), two negative RT-PCR (5 March). Case 2 - RT-PCR positive in Japan (D26), two negative RT-PCR (10 March); Case 3 - RT-PCR positive in Japan (D28), RT-PCR negative (D32). Case 4 - RT-PCR negative in Japan; positive (D35) in Israel; negative on D37 in Israel. Case 5 - RT-PCR negative in Japan, positive on D32, negative on 17 March. Case 6 - RT-PCR positive in…	N/R	N/R	N/R	N/R	N/R	N/R	N/R	N/R	N/R	N/R	N/R	N/R	Case 1, 2, 3 - N/R. Case 4 - Ct > 30, then negative; Case 5 - Ct 20 to 40; Case 6 - Ct > 30	N/A	Follow-up of 15 repatriated Israeli citizens; they were quarantined for 14 days after returning to Israel.	Quarantine of repatriated Israeli citizens.	Interview	N/R	15 px	6 px	71; 67; 74; 76; 62; 69	3M; 3F	3 asymptomatic, 3 pauci symptomatic. 5/6 had abnormal chest CT	Case 1 - RT- PCR positive in Japan (D26), two negative RT-PCR (5 March). Case 2 - RT-PCR positive in Japan (D26), two negative RT-PCR (10 March); Case 3 - RT-PCR positive in Japan (D28), RT-PCR negative (D32). Case 4 - RT-PCR negative in Japan; positive (D35) in Israel; negative on D37 in Israel. Case 5 - RT-PCR negative in Japan, positive on D32, negative on 17 March. Case 6 - RT-PCR positive in…	The 6 cases formed 3 couples.	N/R	Elderly, with multiple comorbidities.	6 px were 3 couples.	Hospitalization	The cohort consisted of six participants, three pairs, which were infected with SARS-CoV-2 during February 2020 on board the Diamond Princess. Of the six confirmed RT-PCR cases, four were initially diagnosed in Japan and two upon their arrival to Israel. Duration of infection was between four days and up to 26 days. In one patient, infectivity was tested using cell culture and a cytopathic effect…	N/R
Hoshino 2021	Yokohama Port (January 20, 2020) - Hong Kong (January 25 2020) - Yokohama (3 February 2020)	Diamond Princess	N/R		Yokohama Port (January 20, 2020) - Hong Kong (January 25 2020) - Yokohama (3 February 2020)	2666 px and 1045 crew	712 (px and cew)	N/R	712 individuals tested positive (up to August 2020)	1 px - fever (D9)?	Date and Ct not reported	N/R	1 px	positive, no data on Ct	N/R	M	N/R	N/R	Fever (D9)	N/R	N/R	RT-PCR positive, no data on Ct	GS for 67 persons abroad the Diamond Princess. Although branch bootstrap values were low, all sequences from the cruise ship clustered with some isolates collected in other countries.	Retrospective. All publicly available SARS-CoV-2 genome sequences with clinical information as of August 7, 2020 (n = 78,448), were retrieved from the Global Initiative on Sharing All Influenza Data (GISAID) database. The numbers of daily confirmed and cumulative cases obtained from the website of the Japanese Ministry of Health, Labour, and Welfare, and previous studies.	Public data	N/A	3711 (2666 px, 1045 crew)	67 cases	711	N/R	N/R	N/R	RT-PCR positive, no data on Ct	N/R	N/R	N/R	N/R	N/A	Authors retained only complete or nearly complete sequences between 29,600 and 31,000 nt that contained <1% ambiguous nucleotides. Sequences were aligned and trimmed according to the reference sequence (NC_045512.2, 29,903 nt) using MAFFT. The estimated origin of the epidemic was January 21, which coincided with the date when the presumed index case boarded the ship. The effective population size…	This research did not receive any specific grant from funding agencies in the public, commercial, or not-for- profit sectors.
Hoshiyama 2020	N/R	Diamond Princess	N/R	N/R	Yokohama Port (3 February 2020)	N/R	696 (up to 10 March 2020)	4/7 crew - cough; 1/7 crew - pneumonia	RT-PCR positive, no data on Ct	N/R	N/R	N/R	N/R	N/R	N/R	N/R	N/R	N/R	N/R	N/R	N/R	RT-PCR positive, no data on Ct	N/A	Single center, retrospective study	Patients admitted to a single center	N/A	N/R	7 crew	7 crew	45; 47; 23; 39; 32; 28; 39 (Range 23 to 47, median=39)	4M; 3F	4/7 cases - cough; 1/7 cases had pneumonia	RT-PCR positive, no data on Ct	N/R	N/R	No vaccination	N/R	Hospitalization	3/7 patients had only normal commensal bacteria detected in both the pharynx and sputum. However, 4/7 patients had bacterial pathogens on sputum culture. The bacterial pathogens included Haemophilus influenzae, Klebsiella pneumoniae, and Staphylococcus aureus. All the cases were asymptomatic or with mild disease.	None.
Hung 2020	Yokohama Port (January 20, 2020) - Hong Kong (January 25 2020) - Yokohama (3 February 2020)	Diamond Princess	N/R	Study starting with 22 Feb (D33)	Yokohama Port (January 20, 2020) - Hong Kong (January 25 2020) - Yokohama (3 February 2020)	3711 (px and crew)	712 (as of May 2020)	N/R	RT-PCR positive	1 px - fever (D12)	positive D12	N/R	1 px	positive (D12); no data on Ct	80	M	N/R	N/R	N/R	N/R	N/R	RT-PCR viral load, log10 copies per mL (nasopharyngeal swab): Case 1- Not determined; Case 2 - 5.00 (D33); 3.90 (D37); 2.84 (D41); Case 3 - 3.86 (D33); 3.92 (D37); Case 4 - 3.71 (D33); 2.71 (D37); Case 5 - 4.01 (D33); 2.87 (D37); 4.69 (D41); 3.30 (D45); Case 6 - 5.68 (D33); Case 7 - 4.31 (D33); Case 8 - 8.43 (D33); 7.14 (D37); 5.04 (D41); 3.57 (D45); Case 9 - 7.62 (D33); 5.97 (D37); 4.52 (D41); 3…	N/A	The authors recruited adult (≥18 years) passengers from Hong Kong who had been on board the Diamond Princess. All participants had been found to be negative for SARS-CoV-2 by RT-PCR 4 days before disembarking and were transferred to further quarantine in a public estate in Hong Kong, where they were recruited. Participants were prospectively screened by quantitative RT-PCR (RT-qPCR) of NP and thr…	Prospective study	Active surveillance	3711	215 px	9 px	median 58 (IQR 56-61)	6F; 3M	6 px asymptomatic; 3 px symptomatic	8 cases: RT-PCR positive on D33; 1 case - serological findings (IgM, IgG). At the last onboard COVID-19 testing by throat swab on D28, all nine individuals tested negative.	N/R	N/R	No vaccination	Each quarantine unit had a bathroom and kitchen and housed one to two people. During the 14-day quarantine period, they were placed in complete isolation. Only health-care workers from the Hong Kong Department of Health would visit daily to do health checks and to deliver meals. Family visits and contact with the general public were not allowed and individuals were asked to handle their own laund…	Further 14 days of quarantine.	The Hong Kong Government chartered two flights on Feb 20 (D31)and Feb 21 (D32)to transfer px who had tested negative to Hong Kong. Participants were screened by quantitative RT-PCR for SARS-CoV-2 in nasopharyngeal, throat, and rectal swabs at baseline (D33), day 4 (D37), day 8 (D41), and day 12 (D45), and tested for serum IgG and IgM against both internal nucleoprotein and the surface spike recep…	Shaw Foundation Hong Kong; Sanming-Project of Medicine (Shenzhen); High Level-Hospital Program (Guangdong Health Commission).
Ing 2020	Ushuaia (Argentina) - crossed the Drake Passage and explored the Antarctic Peninsula visiting locations, including Danco Island, Paradise Bay, Lemair’s Passage and Deception Island - Montevideo (D13)	N/R	N/R	15 March 2020 - 11 April 2020	Danco Island, Paradise Bay, Lemair’s Passage and Deception Island	223 (128 px, 95 crew)	128	24 symptomatic (19%); 104 asymptomatic (81%)	128/217 cases RT-PCR positive (D20)	1 px fever (D8), 3 crew- fever (D10), 2 px and 1 crew - fever (D11); 3 px - fever (D12)	Rapid testing kits for COVID-19 (VivaDiag qSARS-CoV- 2 IgM/IgG) - for the first 9 cases (D13). All returned negative results on D14.	N/R	First cases: 1 px (D8); 3 crew (D10); 2 px and 1 crew (D11); 3 px (D12)	Rapid testing kits for COVID-19 (VivaDiag qSARS-CoV- 2 IgM/IgG) were performed on 6 px and 4 crew (D13) - negative; RT-PCR positive (D20)	N/R	N/R	N/R	N/R	Fever (D8; D10;11; D12 )	N/R	N/R	1 px (D17); 118 (D20)	N/A	All px and crew on the isolated ship (217)	Active surveillance	Medical examination	221	217	Unclear	N/R	N/R	3 individuals - symptoms (D14); 1 px (D23)	RT-PCR positive (D20), no data on Ct	10 instances where two passengers sharing a cabin recorded positive and negative results.	Masks after instalation of quarantine	No vaccination	No passengers or crew that had transited through China, Macau, Hong Kong, Taiwan, Japan, South Korea or Iran in the previous 3 weeks were permitted to board.	Isolation protocols (D8) with all px confined to cabins and surgical masks issued to all. Full personal protective equipment was used for any contact with any febrile patients, and N95 masks were worn for any contact with px in their cabins. The crew still performed duties, including meal services to the cabin doors three times a day, but rooms were not serviced.	In 10 instances, two passengers sharing a cabin recorded positive and negative results.	None.
Kakimoto 2020	Yokohama	Diamond Princess	N/R	4 -12 February 2020	N/R	1068 crew	20 crew	20 crew with positive RT-PCR (31 crew with symptoms)	Rt-PCR positive; no data on Ct	Passenger develops symptoms (D2); Index case? develops fever (D3) (Hong Kong patient); first crew- fever (D13)	Index case - RT-PCR positive (D12)?	The index patient for this outbreak could not be determined.	2 px?	Index case - D12; px - D14	N/R	N/R	N/R	Px were located in cabins on decks 5-12	Index case - fever (D3); 1 px (Hong Kong)- fever (D2)	N/R	Crew members	RT-PCR positive, no data on Ct. First crew with positive RT-PCR (D15)	N/A	Crew members. Survey	Until February 6 (D17), there was no systematic testing; only crew members who visited the medical clinic with symptoms were tested.	Interview	N/A	1068 crew members (245 crew - food service; 176 crew - housekeeping; 135 crew - galley; 61 crew - beverage service; 57 crew - deck; 53 crew - steward; 40 crew - guest service; 28 crew - gift shop; 27 crew - production cast; 5 crew - arts; 241 crew - others)	20 Crew members	N/R	N/R	Symptomatic - 1 crew -D13; 3 crew - D14; 31 crew members (20/32 food workers) - D20;	Deck 2 - 2/171; Deck 3 - 16/582; Deck 4 - 1/148; Deck 5 - 1/84; Deck 6 - 0/33; Deck 7 - 0/30; Others - 0/18	>80% of crew member's cabins were on decks 2–4; 15/20 confirmed cases in crew members occurred among food service workers who prepared food for other crew members and px; 16/20 cases occurred among persons with cabins on deck 3, the deck on which the food service workers lived.	With mask (after the quarantine started - D14)	N/R	After quarantine began, crew members continued to perform their regular duties, delivered meals to passengers, and remained in their cabins when they were not working; symptomatic crew members were required to remain in their cabins. 3 crew members reported close contact with other crew members with confirmed COVID-19 before their symptoms began. 8/20 crew members with confirmed COVID-19 had cabi…	Disembarkation (D15)	The study reports findings from the initial phase of the cruise ship investigation into COVID-19 cases among crew members during February 4–12, 2020. Limitations: Until February 6 (D17), no mechanism for systematic testing was implemented; only crew members who visited the medical clinic with symptoms were tested, and information on the total number of tests administered is not available.	N/R
Maeda 2021	Italian cruise ship Costa Atlantica, docked at Nagasaki City since January 2020 for full maintenance.	Costa Atlantica cruise ship.	N/R	14 March - 29 May 2020. 56 crew members embarked during 14 March – 3 April. Crew members with negative test started to disembark on 3 May 2020. Starting 14 May, crew members who tested positive were able to disembark and travel back to their countries. On 31 May the ship sailed to Manila.	N/A	623 crew, 0 px	149 laboratory-confirmed cases. 107 probable case-patients (who tested negative, but had clinical signs or symptoms indicative of COVID-19.	Laboratory-confirmed cases: 96/149 symptomatic; 53/149 asymptomatic. Probable case-patients: 107	Positive RT-PCR or LAMP; no data on Ct	19 April 2020 - officials of Costa Atlantica reported to Nagasaki City Public Health Center that they had febrile crew members (>37.1°C). A body temperature >37.1°C was first detected in a crew member on 22 March . 5 other crew members had a body temperature >37.1°C during 24-27 March. On 2 April, another crew member had a body temperature >37.1°C; the number of persons with incident fever increa…	Unclear. On 20 April, the authors performed PCR assays for 4 crew members who had a body temperature >37.1°C, resulting in 1 positive result.	N/R	Unclear. 1 crew	N/R	N/R	N/R	Belonged to the entertainment occupation group that boarded the cruise ship from several countries in Europe on 18-19 March	Entertainment group	Fever on 22 March	N/R	N/R	N/R	N/A	The authors did not repeat LAMP and PCR tests for SARS-CoV-2 for nonessential workers in their testing strategy. The essential workers were repeatedly tested because of the potential to spread the infection. Retrospective study; the cruise ship company provided demographic and body temperature data (ship’s medical record) during March 14– May 27 for all crewmembers on board. Before disembarkation…	Cruise ship company.	Smartphone-based remote health monitoring system, ship’s medical doctor.	622 crew	622 crew	Unclear. 149/623 laboratory-confirmed cases, 107/623 probable cases. During 22 March - 29 May, a total of 211 (34%) had a body temperature >37.1°C. One crew member who had a body temperature >37.1°C associated with cellulitis was excluded. On 20 April, the authors performed PCR assays for 4 crew members who had a body temperature >37.1°C, resulting in 1 positive result.	Unclear. Among test-positive crew, the median age was 32 (27–39)	Unclear. Among the test-positive crew: 82 males, 14 females.	Unclear. Among all crewmembers, 0.2% (1/623) had severe pneumonia, 0.3% (2/623) had moderate pneumonia, 32% (200/623) had mild illness, and 67% (420/623) had no signs or symptoms. Among crewmembers with laboratory-confirmed cases, 0.7% (1/149) had severe pneumonia, 1.3% (2/149) had moderate pneumonia, 62% (93/149) had mild illness, and 36% (53/149) had no signs or symptoms.	RT-PCR or LAMP positive. No data on Ct	The outbreak likely started in late March, with the infection introduced into this population from the entertainment occupation group that boarded the ship, which then spread widely inside the ship, irrespective of occupational group, nationality, or crew cabin room location. Apart from the first wave of persons with a body temperature >37.1°C in late March, SARS-CoV-2 infection was distributed s…	N/R	Unclear.	A body temperature >37.1°C was first detected in a crew member on 22 March 22; 5 other crew members had a body temperature >37.1°C during 24-27 March. Their crew cabin rooms were not concentrated in a single area on the ship. However, they belonged to the entertainment occupation group that boarded the cruise ship from several countries in Europe on 18 and 19 March. Starting 19 April - all noness…	The body temperature of all crewmembers had been checked daily since the end of February.Every nonessential worker had been separately isolated or quarantined in a single passenger cabin room and not allowed to leave the room since 19 April. Essential workers were provided with guidance and training for infection prevention on 26 April. To ensure that the essential workers did not interact direct…	Symptomatic was defined as having any clinical sign or symptom of coronavirus disease (i.e., fever (>37.5°C), cough, shortness of breath, nasal congestion, sore throat, nausea or vomiting, conjunctival congestion, headache, fatigue, myalgia or arthralgia, diarrhea, olfactory dysfunction, or taste disorder [loss of taste]. Laboratory-confirmed cases - illness in anyone with a positive test result …	This work was supported by the Nagasaki Prefecture Government.
Moriarty 2020	Voyage A: Roundtrip from San Francisco, California, making 4 stops in Mexico (11-21 February 2020). Voyage B: San Francisco (February 21), with a planned return on March 7. Docked in Oakland, California (8 March 2020)	Grand Princess	N/R	27 days (11 Feb - D0 to 8 Mar - D26);	4 stops (Voyage A)	Voyage B: 3571 px and crew (1111 crew, 2460 px), including 1111 crew and 68 px from Voyage A	Voyage A: over 22 cases. Voyage B: 78 individuals	N/R	Positive (up to 21 March 2020); no data on Ct	2 symptomatic px from Voyage A (D22); only one had a positive RT-PCR; additional 21/45 samples from symptomatic individuals had positive RT-PCR (D23)	22/47 symptomatic individuals had positive RT-PCR (D23)	N/R	Not clear; possibly individuals from Voyage A (crew?)	1 passenger from Voyage A with positive RT-PCR (D23)	N/R	N/R	N/R	N/R	Respiratory symptoms (D22)	N/R	N/R	RT-PCR positive, no data on Ct	N/A	On D23, specimens from 45 passengers and crew with respiratory symptoms for SARS-CoV-2 wete collected for testing. All px and crew from Voyage B. They were transferred to land-based sites (D26) for a 14-day quarantine period or isolation. Persons requiring medical attention for other conditions or for symptoms consistent with COVID-19 were evaluated, tested for SARS-CoV-2 infection, and hospitali…	Quarantine of all px and crew	N/A	3571 px and crew	3571 px and crew	As of March 21, of 469 persons with available test results, 78 (16.6%) had positive test results for SARS-CoV-2.	N/R	N/R	N/R	78/469 RT-PCR positive tests; no data on Ct	Crew: 1.75 (1–4) persons/cabin. Px: 1.95 (1–4) persons/cabin	N/R	N/R	N/R	Px and crew were transferred to land-based sites for a 14-day quarantine period or isolation (D26). Persons requiring medical attention for other conditions or for symptoms consistent with COVID-19 were evaluated, tested for SARS-CoV-2 infection, and hospitalized if indicated. During land-based quarantine in the USA, all persons were offered SARS-CoV-2 testing. Px and symptomatic crew members wer…	Authors assume that crew members were likely infected on voyage A and then transmitted SARS-CoV-2 to passengers on voyage B. They conclude that the Grand Princess was an example of perpetuation of transmission from crew members across multiple consecutive voyages and the potential introduction of the virus to passengers and crew on other ships. Limitation: the new px from Voyage B might also have…	N/R
Moriarty 2020	Yokohama (20 January 2020) - six stops in three countries - Yokohama (3 February 2020)	Diamond Princess	N/R	20 January 2020 - with follow up to 13 March 2020	6 stops in 3 countries	3711 (428 USA px and crew)	712 px and crew (107 USA px and crew)	331 asymptomatic at the time of testing; 381 symptomatic individuals	RT-PCR positive (107 USA citizens)	N/R	RT-PCR positive; No data on Ct	Symptomatic px who departed the ship in Hong Kong (25 January 2020)	1 px	RT-PCR Positive, no data on Ct	N/R	N/R	N/R	N/R	N/R	N/R	N/R	RT-PCR positive, no data on Ct (oropharyngeal swab)	N/A	Initially, travelers with fever or respiratory symptoms and their close contacts were tested for SARS-CoV-2 by RT-PCR. All those with positive test results were disembarked and hospitalized. Testing was later expanded to support a phased disembarkation of passengers, prioritizing testing of older persons, those with underlying medical conditions, and those in internal cabins with no access to the…	N/R	N/A	3711 px and crew	3711 px and crew (428 USA citizens)	712 px and crew (107 USA citizens)	N/R	N/R	331 asymptomatic at the time of testing	Oropharyngeal swab RT-PCR positive, no data on Ct	Crew: 1.73 (1–3) persns/cabin. Px: 1.98 (1–4) persons/cabin	N/R	No vaccination	N/R	All those with positive RT-PCR test results were disembarked and hospitalized. Between February 16–23, nearly 1,000 persons were repatriated by air to their home countries, including 329 persons who returned to the USA and entered quarantine or isolation. Quarantine was used for persons who were exposed; isolation was used for persons who had positive test results for SARS-CoV-2.	On March 23, 2020, this report was posted as an MMWR Early Release on the MMWR website (https://www.cdc.gov/mmwr).	N/R
Murata 2021	N/R	Diamond Princess	N/R	13-21 Feb 2020	N/R	N/R	Data on 90 SARS-CoV-2 infected persons who were asymptomatic at the time of testing and remained so throughout. were available until the resolution of infection, defined as 2 consecutive negative PCR tests. Among them, the NP swab samples of asymptomatic SARS-CoV-2 carriers who had two or more positive RT-PCR test results at the hospital were analyzed for the presence of viable virus using cell c…	Asymptomatic	RT-PCR positive; nasopharyngeal specimens	N/R	N/R	N/R	N/R	N/R	N/R	N/R	N/R	N/R	N/R	N/R	N/R	RT-PCR positive, Cp < 40	SARSCoV- 2 genomic RNA was extracted from culture supernatants and selected nasopharyngeal samples with Cp values < 34. The complete genome sequences of 4 sequential specimens collected from Carrier_1 between 21 Feb - 1 March, as well as those of 9 specimens obtained from a cabinmate of Carrier_1 (Carrier_2) and 6 others, were obtained and analyzed. All SARS-CoV-2 strains belonged to clade 19A, a…	39 asymptomatic carriers. 90 SARS-CoV-2-infected persons, who were asymptomatic at the time of testing con ducted between 13-21 Feb (D24-D32) and their 32 cabinmates who tested negative on the ship were transferred from DP to Fujita Health University Okazaki Medical Center.	N/A	The demographics and coexisting medical conditions were extracted from the medical questionnaire obtained upon their arrival to the hospital. Their body temperature, oxygen saturation, and symptoms were monitored at least twice a day, and the NP swabs were collected approximately every 48 h until two consecutive negative PCR test results were obtained. Those who developed signs and symptoms consi…	N/A	90 asymptomatic individuals, with more than two consecutive or nonconsecutive positive PCR test results at the hospital	90 SARS-CoV-2 infected persons who were asymptomatic at the time of testing and remained so throughout. Of them, 39 had more than two consecutive or nonconsecutive positive PCR test results at the hospital	Median: 67 (IQR, 57 to 72; range, 9 to 77)	21/39 F (54%)	Asymptomatic	RT-PCR positive, Cp<40. The median Cp value of culture-positive samples was 24.6 (IQR, 20.4 to 25.8; range, 17.9 to 30.3). The specimen in which CPE was observed 15 days following the initial positive PCR test was obtained from a 70-year-old Japanese female with a medical history of diabetes mellitus and hypertension, who had prolonged RT-PCR positivity for more than 21 days.	N/R	N/R	1 case who had prolonged RT-PCR positivity for more than 21 days, had several associated conditions	8 of 32 cabinmates who had a negative PCR test on the ship had a positive PCR test after arrival to the hospital but remained asymptomatic.	11 of 96 asymptomatically infected persons developed clinical signs and symptoms of COVID-19, making them presymptomatic instead of asymptomatic, and were transferred to other facilities.	Asymptomatic status was determined at the time of testing based on the absence of fever (temperature of > 37.5°C) and clinical symptoms (cough, dyspnea, chest pain, sore throat, and nasal discharge) by physicians and nurses. CPE evaluation:cultures on VeroE6 cells, were observed for CPE every day for 5 days.A total of 166 samples were analyzed using cell cultures, consisting of 116 PCR-positive s…	Japan Agency for Medical Research and Development (AMED) under grants JP19fk0108150 and JP20fk0108150.
National Institute for Infectious Diseases 2: 5-24 Feb 2020	Yokohama (20 Jan 2020) - Yokohama (2 Feb 2020)	Diamond Princess	N/R	To 24 Feb 2020	Ports in Japan, Hong Kong, Vietnam, and Taiwan, return to Yokohama.	Total: 3711: 2666 px, 1045 crew (on board on 3 Feb 2020 - D14)	696 cases (up to 8 March)	378 asymptomatic cases	RT-PCR positive, no data on Ct	19 Jan (before departure)	RT-PCR positive (D12)	The index case that was reported by Hong Kong authorities was more likely an indicator case; that is, the firs detected case among many infected persons. Many cases had onset dates before the ship’s arrival in Yokohama (D14). Infection by that time was spread across multiple decks without spatial clustering.	544 px and 143 crew were defined as case-patients	Positive RT-PCR, no data on Ct	Case-patients: Px: 67.9 years (SD +/- 12.0). Crew: 37.7 years (SD +/- 9.0)	N/A	N/R	Infected px were observed across different decks; there was no identifiable aggregation or large-scale clustering by deck or zone. Crew decks produced a diffusive pattern, although a large number of cases was observed among restaurant staff on deck 3.	Case-patients: Px 314/544 astmptomatic. Crew: 64/143 asymptomatic		Cabinmates of confirmed case-patients were classified as close contacts.	RT-PCR, no data on Ct	N/A	All px and crew on the isolated ship. Authorities provided thermometers to px and instructed them to check body temperature regularly; crew also received thermometers, although not to every member (D18). A fever call center was established; persons on board were asked to call the center if they had a temperature >37.5°C. Any close contact with a positive test result was considered a case-patient;…	RT- PCR results, information from the ship manifest (age, sex, country of passport, cabin number, and classification as passenger or crew), and symptom data (presence or absence of symptoms, onset date, and severe outcomes) recorded at the time of respiratory specimen collection or through standard public health follow-up of cases.	Retrospective data, extracted from several sources	3711 (2666 px; 1045 crew)	3711	544 px and 143 crew were defined as case-patients	Px case-patients averaged 67.9 years of age (SD +12.0). Crew case-patients averaged 37.7 years (SD +9.0).		Among px case-patients, 314 were asymptomatic. Among crew case-patients, 64 were asymptomatic	RT-PCR positive, no data on Ct	Px cabin capacity ranged from 1 to 4 persons. Crew cabins ranged from 1 to 4 persons. Attack rates among px were highest among those who stayed in 4-person cabins (30.0%; n = 18), followed by 3-person cabins (22.0%; n = 27), 2-person cabins (20.6%; n = 491), and 1-person cabins (8%; n = 6). Infected px were observed across different decks; there was no identifiable aggregation or large-scale clus…	Crew - personal protective equipment	No vaccination	Index case disembarked on D5. Px, organized by deck and section, were allowed a 60-minute period on an exterior deck each day, during which they were instructed to wear masks, refrain from touching anything, and maintain a 1-meter distance from others. Monitors observed these periods. After each group came a 30-minute period in which the areas were disinfected. Room cleaning was suspended. Food a…	Persons with RT-PCR positive test disembarked and were transferred to an isolation facility in Japan. Cabinmates of confirmed case-patients were classified as close contacts, and their 14-day observation period was reset on the last day of contact with the case-patient. Any person on board who developed serious illness, including non–COVID-19 conditions (such as myocardial infarction), was taken …	Authors report epidemiologic assessment of quarantine measures aboard the ship during February 5–24 (D16-D35), including all persons aboard the ship during that time. Definitions: Any person with a positive RT-PCR was defined as having COVID-19. Cabinmates of confirmed case-patients were classified as close contacts. A symptomatic case was defined as one with the presence of COVID-19 related symp…
Plucinski 2020	Yokohama (20 Jan 2020) - Yokohama (3 Feb 2020)	Diamond Princess	N/R		Vietnam, Taiwan, Japan	3711 (437 US citizens, residents, and non-American partners of citizens or residents; 425 px, 12 crew)	114/437 positive result; 302 negative results; 21 not tested.	71 symptomatic at the time of sampling; 366 asymptomatic at the time of sampling	98 individuals had a positive RT-PCR result in Japan before repatriation, 10 had negative results in Japan but then had a positive result in the US; 6 were never tested in Japan and had a positive result in the US.	2020-01-23	98 individuals had a positive RT-PCR result in Japan before repatriation, 10 had negative results in Japan but then had a positive result in the US; 6 were never tested in Japan and had a positive result in the US.	Authors considered the cabinmate with the earliest positive test date as the index case in the cabin. The index case for DP is considered the px who disembarked in Hong Kong.	Those in single-person cabins or in multiperson cabins without a SARS-CoV-2-positive cabinmate had the lowest AR (58/329, 18%, 95% confidence interval [CI]: 13–22%),	RT-PCR positive, no data on Ct	N/R	N/R	US	single-person cabins or multiperson cabins without a SARS-CoV-2 positive cabinmate. The cabinmate with the earliest positive test date was considered as the index case in the cabin.	Fever ≥ 37.5C and/or respiratory symptoms, or/and any self-reported symptoms	N/R	Close contact was considered being in a room with someone for more than 15 minutes without wearing a mask.	RT-PCR positive, no data on Ct	28 GS samples. All genome sequences of SARS CoV-2 viruses from the American travelers carried the same G11083T mutation reported in the presumed Hong Kong index case, consistent with a single index case leading to this cruise ship outbreak.	Cross-sectional survey of American px and crew using a standardized form including questions about demographics; symptoms; comorbidities; smoking; participation in group events during 3–5 February, the period just before ship-based quarantine; shore excursions during the voyage; and close contacts during the ship-based quarantine. Questionnaires were translated into 6 languages. Data collected fo…	All American px and crew.	Authors surveyed all Americans on the 20 Jan to 3 Feb sailing of the DP. Patients who were severely ill at the time of the survey and unable to answer questions were excluded (n = 10). Participants were interviewed 28 Feb to 18 March, approximately 2–5 weeks after disembarkation. The survey response rate was 229/437 (52%).	128 presumed close contact of a COVID-19 case; 309 non-close contacts	76/128 close contacts interviewed; 153/309 nonclose contacts were interviewed	AR among Americans: 26%. Attack rates increased from 17% in cabins without infected cabinmates to 81% in cabins with a symptomatic infected cabinmate. Px with at least 1 asymptomatic SARS-CoV-2 positive cabinmate but no symptomatic SARSCoV-2-positive cabinmates (AR 27/43, 63%, 95% CI: 50–76%). Px with at least one symptomatic SARS-CoV-2-positive cabinmate had the highest AR (25/31, 81%, 95% CI: 6…	N/R	N/R	Fever ≥ 37.5C and/or respiratory symptoms, or/and any self-reported symptoms.	RT-PCR (NP swab, OP swab or both). Samples from repatriated Americans testing positive in the US (n = 28) underwent GS for SARS-CoV-2	AR did not differ by cabin location. There was an association between AR and SARS-CoV-2 status of cabinmate (P-value < .01). Those in single-person cabins or in multiperson cabins without a SARS-CoV-2-positive cabinmate had the lowest AR (58/329, 18%, 95% confidence interval [CI]: 13–22%), followed by px with at least 1 asymptomatic SARS-CoV-2-positive cabinmate but no symptomatic SARSCoV- 2-posi…	N/R	No vaccination	The study results suggest that substantial SARS-CoV-2 transmission occurred on the ship before implementation of quarantine, followed by intracabin transmission among cabinmates during cabin quarantine. The association between reported participation in certain events, for example, the bus excursion in Cai Rang, Vietnam, and group activities on 3–4 February, suggests several common mass exposure e…	Among SARS-CoV-2-positive Americans, 10 (9%) required intensive care.	GS - 28 individuals. A phylogenetic tree was built using the global database of SARS-CoV-2 sequences available before 20 March 2020. All genome sequences of SARS CoV-2 viruses from the American travelers carried the same G11083T mutation reported in the presumed Hong Kong index case, consistent with a single index case leading to this cruise ship outbreak. Definitions: A SARS-CoV-2 case = a posit…	N/R
Quiglei 2021 - 10 ships	N/R	Diamond Princess, Ruby Princess, Ovation of the Seas, Voyager of the Seas, Celebrity Solstice, Artania, Costa Victoria, Silver Explorer, Greg Mortimer, Celebrity Eclipse	N/R	25 Jan - 30 April 2020	N/R	Total px: 24862 (Diamond Princess n=3200, Ruby Princess n=2700, Ovation of the Seas n=4800, Voyager of the Seas n=3100, Celebrity Solstice n=3400, Artania n=1250, Costa Victoria n=2310, Silver Explorer n=465, Greg Mortimer n=217, Celebrity Eclipse n=3420)	Total cases: 1908 (Diamond Princess n=712, Ruby Princess n=753, Ovation of the Seas n=98, Voyager of the Seas n=45, Celebrity Solstice n=17, Artania n=81, Costa Victoria n=15, Silver Explorer n=4, Greg Mortimer n=128, Celebrity Eclipse n=67)	N/R	RT-PCR positive, no data on Ct. Australian confirmed cases were those with a diagnosis based on positive viral nucleic acid test results on throat swab samples between January 20, 2020 and April 30, 2020. The date of COVID-19 confirmation was recorded as a proxy for the onset date.	N/R	N/R	N/R	N/R	N/A	N/R	N/R	N/R	N/R	N/R	N/R	N/R	RT-PCR positive, no data on Ct	N/A	Authors used data publicly available, real-time data on laboratory-confirmed COVID-19 patients nationwide obtained from the Australian Government Department of Health, individual state/ territory Health Department, and official reports from the WHO. Data such as the date of confirmation, basic demographics, cruise ship/travel history, location, cluster information, and mortality were recorded. An…	Public data	N/A	N/A	N/A	N/R	N/R	N/R	N/R	Real-time data on laboratory confirmed COVID-19 patients nationwide (Australia)	N/R	N/R	No vaccination	N/R	Although cruise passengers underwent a mandatory quarantine period upon arriving in Australia, not all were tested for COVID-19. Testing was only done for symptomatic px.	Australian confirmed cases were those with a diagnosis based on positive viral nucleic acid test results on throat swab samples between January 20, 2020 and April 30, 2020. The date of COVID-19 confirmation was recorded as a proxy for the onset date. The overall proportion of Australian passengers aboard these cruise ships was 22.51% (n = 10 142). Additionally, of the total COVID-19 cases of the …	None.
Quigley 2021 - 36 ships	Global	N/R	N/R	5 Feb-11 May 2020	N/R	N/R	AR = 8.66% (0.03% to 75.12%).	N/R	N/R	N/R	N/R	N/R	N/R	N/R	N/R	N/R	International	N/R	N/R	N/R	N/R	N/R	N/A	A database of publicly available data for a total of 43 cruise ships with reported COVID-19 infected px during the study period were created. Data were sourced from news reports and cruise ship alerts. Cruise ship layout, design, COVID-19 passenger cases, deaths, total passengers on board, and the number of crew for each ship was analyzed. Due to missing passenger information, seven ships were ex…	N/R	N/A	N/R	N/R	N/R	N/R	N/R	N/R	N/R	The number of available cabins had a moderate inverse correlation with the AR (-0.4154; 95% CI –[0.0002, -0.00003], P < 0.012); as the number of available cabins per ship increased, the AR decreased. There was a fair inverse correlation of decks with cabins (-0.3832; 95% CI [-0.0579, -0.0050], P < 0.021); the more spread out the cabins were throughout various decks, the lower AR occured. There wa…	N/R	No vaccination	N/R	N/R	There were 50 cruise ships with reported COVID-19 cases at sea between 5 Feb and 11 May, with demographic data available for 43 of these ships only. The duration of cruises was not associated with risk of infection. Inverse correlations between enclosed areas on board and COVID-19 cases suggest modifiable design features on cruise ships should be reviewed.	None.
Sekizuka 2020 Cruise 1	Luxor - Aswan	N/R	N/R	Px 1: 22Feb - 25 Feb 2020 (D1-D4); Px 2-1 and Px 2-2: 24 Feb 26 Feb 2020 (D3-D5)	N/R	N/R	Total cases: N/R; 3 px	3 Symptomatic (D9)	RT-PCR positive (Px 1 - D16; Px 2-1 and Px 2-2 - D18); no data on Ct	N/R	N/R	N/R	N/R	N/R	N/R	N/R	N/R	Nile River cruise	N/R	N/R	Individuals on the same cruise	RT-PCR positive (Px 1- D16; Px 2-1 and Px 2-2 - D18)	Px 2-1 and Px 2-2 had visited Egypt together and traveled aboard the same Nile River cruise ship, and SARS-CoV- 2 genome sequences isolated from them are identical with that of Px 1	Cases with RT-PCR positive. Authors evaluated viral genome sequences fromSARS-CoV-2-positive travelers who returned from Egypt, and characterized the haplotype networks to demonstrate possible routes of the spread.	Authors evaluated viral GS from 10 SARS-CoV-2- positive travelers who returned from Egypt, as well as their close contacts, to identify possible routes of spread.	N/R	N/R	3	3 px	60, 70, 60	2F, 1 M	Sympromatic D9	RT-PCR positive, no data on Ct	Px 2-1 and Px 2-2 visited Egypt together and traveled aboard the same Nile River cruise ship	N/R	No vaccination	Stay in Egypt 21-29 Feb 2020. Px 1 - cruise between 22-25 Feb 2020; Px 2-1 and Px 2-2 - cruise between 24-26 Feb. travel from and to Japan by flight. The couple Px 3-1 and Px 3-2 visited Egypt together, on the same Tokyo to Cairo flight as the above Px 1 patient but boarded a different Nile River cruise ship.	N/R	The GS of px 1, 2-1 and 2-2 are distinct from the GS of Px 3-1 and 3-2) by only one SNV. Px1 and Px 3 patients are closely related to GS of SARS-CoV-2 isolates in Egypt (GISAID) with 2 or 3 SNVs	Grant-in Aid from the Japan Agency for Medical Research and Development (AMED) under Grant number JP19fk0108103 and JP19fk0108104.
Sekizuka 2020 Cruise 2	Aswan - Luxor	N/R	N/R	Px 3-1 and Px 3-2: 24 Feb - 26 Feb 2020 (D1-D3)	N/R	N/R	Total cases: N/R; 2 px	2 symptomatic (D11; D24)	RT-PCR positive (Px 3-1 - D15). Px 3-2 negative on D16, positive on D26); no data on Ct	N/R	N/R	N/R	N/R	N/R	N/R	N/R	N/R	Nile River cruise	N/R	N/R	Individuals on the same cruise	RT-PCR positive (Px 3-1- D15; Px 3-2 - D26)	The SARS-CoV-2 isolates show identical GS, and are distinct from the genome sequences (Px 1, Px 2-1, and Px 2-2) by only one SNV.	Cases with RT-PCR positive. Authors evaluated viral genome sequences fromSARS-CoV-2-positive travelers who returned from Egypt, and characterized the haplotype networks to demonstrate possible routes of the spread.	Authors evaluated viral GS from 10 SARS-CoV-2- positive travelers who returned from Egypt, as well as their close contacts, to identify possible routes of spread.	N/R	N/R	2	2 px	70, 70	1M, 1 F	Symptomatic D11, D24	RT-PCR positive, no data on Ct	The couple Px 3-1 and Px 3-2 visited Egypt together, on the same Tokyo to Cairo flight as the above Px 1 patient but boarded a different Nile River cruise ship.	N/R	No vaccination	Stay in Egypt 21-29 Feb 2020. Px 3-1 and Px 3-2 couple, traveled together. They traveled on the same tokyo-Cairo flight with Px 1	N/R	The GS of px 1, 2-1 and 2-2 are distinct from the GS of Px 3- 1 and 3-2 by only one SNV. Px 3-1 and 3-2 had identical GS. Px1 and Px 3 patients are closely related to GS of SARS-CoV-2 isolates in Egypt (GISAID) with 2 or 3 SNVs	Grant-in Aid from the Japan Agency for Medical Research and Development (AMED) under Grant number JP19fk0108103 and JP19fk0108104.
Sekizuka 2020 -paper 2	Yokohama to Yokohama	Diamond Princess	N/R	Follow up- to 8 March 2020	Kagoshima, Hong Kong, Vietnam, Taiwan, Okinawa	3711 (2666 px and 1045 crew)	697 cases (up to 8 March)	N/R	RT-PCR positive	Cough (D3)	RT-PCR positive (D12)	Px who disembarked in Hong Kong (Hong Kong-related COVID-19 case)	1 px	RT-PCR, no data on Ct (D12)	80	1M	N/R	N/R	Cough (D3)	N/R	N/R	RT-PCR - pharingeal specimens of 896 individuals (880 px, 15 crew, 1 quarantine officer). Positive results: 148 cases (138 px, 9 crew, 1 quarantine officer) (D26-D28)	In total, 70 whole-genome sequences have been determined (9/22RT-PCR positive symptomatic cases; 65/125 RT-PCR positive asymptomatic cases; 1 RT-PCR positive case with symptoms not reported). The Cq limit for successful genome sequence determination was around 32, which corresponds to a virus copy number of less than 300. Focusing of the HN-GSNVs map on only the DP isolates in the cluster reveale…	From February 3 to 4 (D14-D15) the health status of all px and crew was investigated by quarantine officers and upper respiratory specimens were collected from symptomatic px, crew, and their close contacts for RT-PCR testing.	Observational study	N/R	3711	896 cases (880 px, 15 crew, 1 quarantine officer)	148 individuals (138 px, 9 crew, and 1 quarantine officer)	N/R	N/R	Symptomatic 65 cases (RT-PCR positive 22, RT-PCR negative 43). Asymptomatic 830 cases (RT-PCR positive 125; RT-PCR negative 705); Symptoms N/R 1 case (RT-PCR positive)	RT-PCR positive, Cq 16.0 to 38.31	Authors did not find any area-specific events of COVID-19 spread in the DP because all COVID-19 patients were widely distributed in all 18 decks across the ship.	N/R	N/R	3 cabin mates showed infection by viruses with the same haplotype (two pairs in the DP-A cluster and one pair in another cluster), and 5 pairs shared haplotypes linked by a single SNV (A to DP0290, A to DP0481, A to DP0645, A to DP0803, and DP0764 to DP0765).	N/R	The 73 genome sequences (including 3 sequences of DP isolates deposited in the GISAID) were compared with the Wuhan-Hu-1 (isolated on December 26, 2019 in China) genome sequence as a reference. The frequencies of SNVs suggested that all 73 isolates shared a SNV: The G nucleotide at the 11,083 position on the Wuhan-Hu-1 genome sequence was mutated to T (G11083T transversion), leading to a nonsynon…	Grant-in Aid from the Japan Agency for Medical Research and Development under Grant Nos. JP19fk0108103 and JP19fk0108104.
Walker 2021	Yokohama to Yokohama	Diamond Princess	N/R	20 January 2020 - 19 February 2020. Repatriation on D30, followed by 14 days quarantine.	Shore excursions in Japan, Hong Kong, Taiwan.	223 Australian citizens / 3711 px and crew (6% of all px and crew)	56/223 (by D38); 46/56 were diagnosed in Japan and 10/56 after repatriation in Australia	35/49 symptomatic (71%); 14/49 (29%) asymptomatic.	RT-PCR positive in Japan (46/56) or In Australia (10/56)	Mild dry cough (starting D3)	RT-PCR positive	N/R	1 px	RT-PCR positive	N/R	N/R	Hong Kong	N/R	Mild dry cough starting D3	N/R	N/R	RT-PCR positive, no data on Ct	N/A	From the total of 223 Australian px, the authors interviewed 196 individuals with a response rate of 79% (44/56) for SARS-CoV-2 positive cases and 91% (152/167) for SARS-CoV-2 negative individuals. Six individuals declined to participate and 21 were noncontactable. Data were collected using a paper-based questionnaire modified from the WHO’s "The First Few X cases and contacts (FFX) investigation…	On 19 February the Australian Government responded by repatriating 156 asymptomatic Australians, 6 foreign partners and 4 crew to a quarantine facility located at Howard Springs, Darwin, Northern Territory, where they were quarantined for a further 14 days. In-country medical health liaison support was also provided to 46 infected Australians who remained in Japanese hospitals and 21 SARS-CoV-2 n…	Retrospective cohort study of Australian px on board the DP cruise ship, conducted through face-to-face or telephone interviews, in Australia and Japan, between 1 March and 6 April 2020. Five additional SARS-CoV-2 positive cases were identified from the Australian National Notifiable Disease Surveillance System (NNDSS) and the DP manifest.	223	196/223	56/223	0-9 years - 0 cases (AR=0%); 10-19 years - 3 cases (AR=30%), 20-29 years - 5 cases (AR=63%); 30-39 years - 0 cases (AR=0%), 40-49 yers - 2 cases (AR=20%); 50-59 years - 12 cases (AR=38%); 60-69 years - 14 cases (AR=17%); 70-79 years - 19 cases (AR=29%); 80-89 years - 1 case (AR=10%).	26M, 30F	35/49 (71%) of cases experienced symptoms prior to virologic clearance; 34/35 (97%) could identify their exact date of illness onset. 6/35 had symptoms before quarantine commenced on D16. 23/35 of symptomatic cases occurred within one incubation period (mean 5.2 days, 95th percentile 12.5 days) of the start of the ship-based quarantine, including 4 people who were repatriated but identified with …	RT-PCR positive, no data on Ct	Prior to ship-based quarantine, exposure to a close contact or cabin mate later confirmed SARS-CoV-2 positive was associated with a 3.78 fold (95% CI, 2.24–6.37 higher risk of COVID-19 acquisition compared to non-exposed px. Exposure to a positive cabin mate during the ship’s quarantine carried a relative risk of 6.18 (95% CI, 1.96–19.46) of developing COVID-19.	N/R	N/R	People sharing a cabin or who were a close contact of a confirmed SARS-CoV-2 case prior to ship quarantine commencing were 3.78 (95% CI 2.24–6.37) times more likely to become infected compared to those with no known exposure. The relative risk of testing SARS-CoV-2 positive from an exposure to a known SARS-CoV-2 positive cabin mate during ship-based quarantine was 6.18 (95% CI 1.96–19.46). There …	All SARS-CoV-2 cases were hospitalised on diagnosis, irrespective of illness severity. After repatriation - 14 days quarantine, with sensitive daily screening for symptoms and temperature checks.	The illness peaked around 3–5 days after quarantine started which supports previous findings that the movement restrictions placed on 5 February reduced the risk of infection among those px who had no known close contact with an infected individual. Ship based quarantine was effective at reducing transmission of SARS-CoV-2 amongst Australian px, but the risk of infection was higher if an individu…	The author(s) received no specific funding for this work.
Waltenburg 2021	N/R	Diamond Princess	N/R	During February 16–17, 329 US citizens, residents, and their partners voluntarily repatriated to the US from Japan.	N/R	329 US citizens, residents, and their partners, voluntarily repatriated to the US from Japan. 328 US citizens were quarantined. One citizen recovered from SARS-CoV-2 infection in Japan	45 / 328 cases tested positive. Among 45 travelers, 28 (62%) had a positive RT-PCR result in Japan before repatriation, 10 (22%) had negative results in Japan but then had a positive result in the US, and 7 (16%) who were never tested in Japan had a positive result in the US.	Asymptomatic or mild symptoms. Among 45 positive cases, 25 (56%) were asymptomatic or presymptomatic at the time of first positive SARS-CoV-2 result.	Rt-PCR positive (Ct<40). Ct values, available from 230 SARS-CoV-2 positive RT-PCR tests from 43 travelers. Intermittent viral shedding was observed in 16 (35.6%) of 45 travelers.	N/R	N/R	N/R	N/R	N/R	N/R	N/R	N/R	N/R	N/R	N/R	N/R	Cycle threshold (Ct) values for amplification of two targets (N1 and N2) of the viral nucleocapsid gene were analyzed for NP and OP specimens submitted to CDC. Specimens with Ct values <40 for both targets were considered positive for SARS-CoV-2.	N/A	Retrospective, longitudinal study. Travelers who tested positive for SARS-CoV-2 were isolated in hospitals or at home under county isolation orders and underwent serial testing by RT-PCR approximately every other day, as contemporaneous US guidance required two consecutive negative tests collected ≥24 hours apart and symptom improvement before release from isolation. Authors reviewed demographic …	Among 329 US repatriated citizens, 328 were were quarantined under federal authority at US military bases	Retrospective longitudinal data. Available RT-PCR results were obtained from the Japanese Ministry of Health, Labour, and Welfare, the Centers for Disease Control and Prevention (CDC), and state public health laboratories	329 USA citizens	328	45 cases / 328 USA citizens	Median age 68 (62–74)	20M; 25F	25 (56%) of 45 travelers were asymptomatic or presymptomatic at the time of first positive SARS-CoV-2 result.	RT-PCR positive, Ct<40. Ct values, available from 230 SARS-CoV-2 positive RT-PCR tests from 43 travelers	N/R	N/R	1 case recovered from SARS-CoV-2 infection in Japan	Travelers who tested positive for SARS-CoV-2, were isolated in hospitals or at home under county isolation orders.	Travelers who tested positive for SARS-CoV-2, were isolated in hospitals or at home under county isolation orders and underwent serial testing by RT-PCR approximately every other day, as contemporaneous US guidance required two consecutive negative tests collected ≥24 hours apart and symptom improvement before release from isolation.	Specimens were collected by OP and/or NP swab and tested by RT-PCR for SARS-CoV-2. Available RT-PCR results were obtained from the Japanese Ministry of Health, Labour, and Welfare, the Centers for Disease Control and Prevention (CDC), and state public health laboratories. Definitions: asymptomatic, presymptomatic (no symptoms at time of first positive result but later developed symptoms), or symp…	None.
Yamagishi 2020 (20 Jan- 9 Feb 2020)	Yokohama to Yokohama	Diamond Princess	Internal air re-circulation was stopped on the cruise ship (from D16)	Up to 9 Feb 2020 (D20)	Visits: Hong Kong (25 Jan), Vietnam (27 January), Taiwan (31 January) and Okinawa, Japan (1 Feb), returning to Yokohama Port on 3 Feb. The index case participated in a tour of Kagoshima, Japan on 22 January (D2) during a shore-based stop.	2645 px and 1068 crew	172 (152 px and 20 crew)	Among the 168 confirmed cases with information about symptoms at the time of sampling available, 24 were asymptomatic (14%); including the two individuals who disembarked because of emergency medical indication.	RT-PCR positive, no data on Ct (D14-D20)	Index case: 19 Jan (before departure) - cough, 30 Jan (D10) - fever	RT-PCR positive (D12)	Px who disembarked in Hong Kong (Hong Kong-related COVID-19 case)	1 px	RT-PCR positive on D12, no data on Ct	80 years	1M	N/R	The case participated in a tour of Kagoshima, Japan on 22 Jan (D2) during a shore-based stop	Cough (one day before cruise), fever (D10); disembarked on D5	N/R	Close contact = someone who joined the Kagoshima tour with the index case, who shared a cabin with a confirmed case or who shared the same cabin with a suspected case. Suspected case = a passenger or a crew member who had a fever ≥ 37.5 °C or respiratory symptoms during the investigation period or identified during the review of the ship’s medical clinic records.	Starting on 3 February (D14), quarantine officers took oropharyngeal samples from suspected cases and close contacts.	N/A	Starting on 3 Feb (D14), quarantine officers took oropharyngeal samples from suspected cases and close contacts. As at 7 Feb (D18), the testing strategy was changed: only suspected cases were tested, which had been increasing in number.	Authors collected all suspected and confirmed cases’ general information, clinical symptoms, RT-PCR test results and contact information from the multiple sources.	N/A	2,645 passengers and 1,068 crew; 490/3713 individuals were tested	490 individuals were tested; 358 (73%) were suspected cases, 86 (18%) were close contacts, two were individuals tested before emergency disembarkation for medical reasons, three were family members of these individuals and the remainder (n = 41, 8%) were individuals without information about symptoms and contacts.	172 (152 px, 20 crew): 144 (84%) met the suspected case definition before testing, while 19 (11%) shared a cabin with a confirmed case	Median age 69 (IQR 60–74)	87F; 85M	At time of sampling: 144 symptomatic, 24 asymptomatic, 4 not available	RT-PCR positive (D14-D20)	19 individuals with a positive RT-PCR shared a cabin with a confirmed case. Number of cases by deck: Deck L - 8/132 px ; Deck A: 35/463 px; Deck B: 19/536 px; Deck C 29/521 px; Deck D 24/435 px; Deck E: 26/373 px; Deck F: 0/27 px; Deck P 11/158 px. Deck 2: 2/171 crew; Deck 3: 16/582 crew; Deck 4: 1/148 crew; Deck 5: 1/84 crew; Deck 6: 0/33 crew; Deck 7: 0/6 crew; Deck 12: 0/6 crew; Deck 14: 0/12 …	Surgical/N95 masks	No vaccination	Among the 172 confirmed cases, 144 (84%) met the suspected case definition before testing while 19 (11%) shared a cabin with a confirmed case. There were 24 asymptomatic cases (14%) among confirmed cases, mainly among px who joined a bus tour in Kagoshima.	After notification of the case from Hong Kong, the MHLW began a quarantine on the cruise ship at Yokohama Port on 3 February. The Emergency Operating Centre (EOC) was set up on 5 Feb (D16); on this date, all px were also isolated in their cabins and internal air re-circulation was stopped to reduce the possible risk of airborne transmission. Crew members continued to work, following guidance from…	Definitions: Confirmed case = a passenger or crew member with positive RT-PCR test result for SARS-CoV-2. Suspected case = px or a crew member who had a fever ≥ 37.5 °C or respiratory symptoms during the investigation period or identified during the review of the ship’s medical clinic records. Asymptomatic case = a person without symptoms at the time of investigation. Close contact = someone who …
Yamahata 2020	Yokohama Port (January 20, 2020) - Hong Kong (January 25 2020) - Yokohama (3 February 2020)	Diamond Princess; Dimensions: 290 m long; 37.5 m wide; with 18 floors. Description: Each room has a toilet and shower. The high-class rooms are large and have balconies. As the class level decreases, the area of the rooms becomes smaller and the rooms are located on lower floors. The lowest class rooms are interior rooms with no windows. Crew rooms are even smaller and have limited personal space.	N/R	Up to 8 March 2020	N/R	3711 (2666 px and 1045 crew)	696	410 (58.9%) asymptomatic; 286 (41.1%) symptomatic	696 - RT-PCR positive; 3015 RT-PCR negative; no data on Ct	Fever (D10)	RT-PCR positive (D12); no data on Ct	1 px who disembarked on D5 (Hong Kong)	1 px	RT-PCR positive (D12)	N/R	M	N/R	N/R	Asymptomatic (D0-D9); fever (D10)	No	N/R	D16 - 10/31 individuals; D17 - 10/71 individuals; D18 - 41/171 individuals; D19 - 3/6 individuals; D20 - 6/57 individuals; D21 - 65/103 individuals; D23 - 39/53 individuals; D24 - 44/221 individuals; D25 - 67/217 individuals; D27 - 70/289 individuals; D28 - 99/504 individuals; D29 - 88/681 individuals; D30 - 79/607 individuals; D31 - 13/52 individuals; D34 - 57/831 individuals	N/A	All px and crew underwent medical examinations.	Active case finding	Medical examination	3711 (2666 px; 1045 crew)	3711	696 (18.8%)	N/R	N/R	410 (58.9%) asymptomatic; 286 (41.1%) symptomatic; 54% (n=221) of the asymptomatic patients with a positive RT-PCR result had observable lung opacities on chest CTs.	RT-PCR positive, no data on Ct	N/R	N/R	No vaccination	The elevator hall in front of the medical center could have had a higher infection risk because it was not possible for infected and noninfected people to use the elevator separately. All px were quarantined in their cabins for 14 days. The crew continued to maintain ship functions and support px for their food, clothing, and shelter-related needs.	Quarantine (D14); D16 - all px were quarantined in their cabins for 14 days; the cabin crew was not isolated since they needed to maintain the ship's functions and provide px with food and laundry. Those who tested positive were promptly notified that they were positive before being transferred to the hospital or quarantine facilities. Since a certain number of false negative RT-PCR results were …	Asymptomatic- no fever (body temperature <37.5 °C as measured by an axillary thermometer), with an SpO2 (blood oxygen saturation) of 97% or above as measured with a pulse oximeter in room air. Testing strategy: During the quarantine, RT-PCR testing of throat swabs was extended to all px in the following order: 1. Symptomatic patients and their close contacts. 2. Elderly people aged 80 years or ab…	None.
Yeh 2021	Yokohama	Diamond Princess	N/R	20 January 2020 to 21 February 2020	N/R	3711 px and crew	712 px and crew	331 (46.5%) asymptomatic at the time of testing	RT-PCR positive, no data on Ct	N/R	RT-PCR positive on D12	N/R	Unclear. 1 or 2	RT-PCR positive, no data on Ct	N/R	N/R	Hong Kong	N/R	N/R	N/R	N/R	RT-PCR positive, no data on Ct	Viral sequences and sequencing methods are available in the GISAID and GenBank® databases. The authors analysed evolution dynamics of SARS-CoV-2 using computational tools of phylogenetics, natural selection pressure and genetic linkage. There were 25 samples from US and 3 samples from Japan. They identified a total of 24 new viral mutations across 64.2% (18/28) of samples; the virus evolved into …	From GISAID and GenBank® databases, the authors downloaded 28 sequences and annotations of the isolates from the cruise ship, as well as the reference genomes of SARS-CoV-2 isolates PBCAMS-WH-04 (accession no. MT019532), WIV04 (MN996528), Hu-1 (NC045512) and WHU01 (MN98868). The samples were collected between 10 and 25 February 2020.	Genetic database	N/A	3711 px and crew	28	712	N/R	N/R	381 symptomatic individuals, 331 were asymptomatic at the time of testing	RT-PCR positive, no data on Ct.	N/R	N/R	N/R	During cruise	N/R	The SARS-CoV-2 outbreak in the cruise most likely originated from either a single person infected with a virus variant identical to the WIV04 isolates, or simultaneously with another primary case infected with a virus containing the 11083G > T mutation. The findings indicate that the 11083G > T mutation of SARS-CoV-2 spread during shipboard quarantine and arose through de novo RNA recombination u…	N/R
